# Supplementary material for: Ferromagnetic Archimedean polyhedra {Fe24M18} (M = Fe, Ni, and Mn) with tunable electron configurations
Source: Royal Society of Chemistry journal article supplement (doi:10.1039/d1qi00593f), 2021-01-01
Supplement: d1qi00593f1.pdf [file d1qi00593f1.pdf]

## Supporting Information

### **Ferromagnetic Archimedean Polyhedra {Fe<sub>24</sub>M<sub>18</sub>} (M = Fe, Ni, and Mn) with Tunable Electron Configurations**

Wen Wen,<sup>a</sup> Yin-Shan Meng,<sup>\*a</sup> Cheng-Qi Jiao,<sup>a</sup> Qiang Liu,<sup>a</sup> Hai-Lang Zhu,<sup>a</sup> Ya-Ming Li,<sup>a</sup> Hiroki Oshio<sup>a</sup> and Tao Liu<sup>\*a</sup>

<sup>a</sup>State Key Laboratory of Fine Chemicals, Dalian University of Technology, Dalian, 116024, China.

\*Corresponding author. Email: [mengys@dlut.edu.cn](mailto:mengys@dlut.edu.cn) (Y.-S. Meng); [liutao@dlut.edu.cn](mailto:liutao@dlut.edu.cn) (T. Liu)

## Contents

|                                                                                                                                                   |            |
|---------------------------------------------------------------------------------------------------------------------------------------------------|------------|
| <b>Experimental Section</b> .....                                                                                                                 | <b>S3</b>  |
| <b>Table S1:</b> Crystal Data and Structure Refinements for compounds <b>1-3</b> at 150 K.....                                                    | <b>S6</b>  |
| <b>Table S2:</b> Selected Bond Lengths (Å) and Bond Angles (°) for compound <b>1</b> .....                                                        | <b>S7</b>  |
| <b>Table S3:</b> Selected Bond Lengths (Å) and Bond Angles (°) for compound <b>2</b> .....                                                        | <b>S8</b>  |
| <b>Table S4:</b> Selected Bond Lengths (Å) and Bond Angles (°) for compound <b>3</b> .....                                                        | <b>S9</b>  |
| <b>Table S5:</b> The Fe···Fe edge lengths for the squares, rectangles, and regular triangles for compounds <b>1-3</b> .....                       | <b>S10</b> |
| <b>Table S6:</b> Mössbauer parameters for compounds <b>1-3</b> at 80K .....                                                                       | <b>S11</b> |
| <b>Table S7:</b> ICP-AES experiments results for compounds <b>1-3</b> .....                                                                       | <b>S12</b> |
| <b>Table S8:</b> The $\chi_m T$ value at 300 K and Curie-Weiss fitting value of <b>1-3</b> .....                                                  | <b>S13</b> |
| <b>Table S9:</b> The ground spin state, $\Delta S_{\max}$ (experimental and calculated) for <b>1-3</b> .....                                      | <b>S14</b> |
| <b>Table S10:</b> Summary of $\Delta S_{\max}$ data for reported discrete 3d-metal clusters .....                                                 | <b>S15</b> |
| <b>Figure S1:</b> Thermo-gravimetric analysis curve for compounds <b>1-3</b> .....                                                                | <b>S16</b> |
| <b>Figure S2:</b> X-ray powder diffraction data for compounds <b>1-3</b> .....                                                                    | <b>S17</b> |
| <b>Figure S3:</b> The asymmetric unit and crystal packing for <b>1-3</b> .....                                                                    | <b>S18</b> |
| <b>Figure S4:</b> The frame structure and skeleton structure with metal ions bridged by cyanide groups and packing structure for <b>1-3</b> ..... | <b>S19</b> |
| <b>Figure S5:</b> Construction of pseudo-rhombicuboctahedron through cut of a cubic .....                                                         | <b>S20</b> |
| <b>Figure S6:</b> Peak area ratio of different type of Fe species.....                                                                            | <b>S21</b> |
| <b>Figure S7:</b> XPS spectra of Ni 2p for compound <b>2</b> and Mn 2p for compound <b>3</b> .....                                                | <b>S22</b> |
| <b>Figure S8:</b> Field-dependent of magnetic susceptibility for compounds <b>1-3</b> .....                                                       | <b>S23</b> |
| <b>Figure S9:</b> Plot of magnetization ( $M/N\beta$ ) vs $HT^{-1}$ for compounds <b>1-3</b> .....                                                | <b>S24</b> |

## Experimental Section

### Materials

All chemical reagents were acquired from commercial sources and used without further purification.

[Bu<sub>4</sub>N][Fe(Tp)(CN)<sub>3</sub>] (Tp = hydrotris(pyrazolyl)borate) was synthesized according to the literature's method.<sup>S1</sup>

### Synthesis of compounds 1-3

Compounds **1-3** were constructed through the reaction of [Bu<sub>4</sub>N][Fe<sup>III</sup>(Tp)(CN)<sub>3</sub>], pyridine-4-carboxaldehyde and M(ClO<sub>4</sub>)<sub>2</sub>·6H<sub>2</sub>O (M = Fe<sup>2+</sup>/Ni<sup>2+</sup>/Mn<sup>2+</sup>). 1.0 mL aqueous solution of M(ClO<sub>4</sub>)<sub>2</sub>·6H<sub>2</sub>O (0.010 mmol) was placed at the bottom of a test tube, a mixture of methanol and water (1: 1, v/v, 6 mL) was gently layered on the top of the solution, and then 1.0 mL methanol solution of Bu<sub>4</sub>N[Fe<sup>III</sup>(Tp)(CN)<sub>3</sub>] (0.010 mmol) and pyridine-4-carboxaldehyde (0.020 mmol) was carefully added as the third layer. After a few weeks, cubic crystals of **1-3** were collected. Yield for compound **1**: 38% based on Fe(ClO<sub>4</sub>)<sub>2</sub>·6H<sub>2</sub>O. Anal. Calcd (%) for C<sub>360</sub>H<sub>354</sub>B<sub>24</sub>Fe<sub>42</sub>N<sub>228</sub>O<sub>54</sub>: C 38.12, H 3.15, N 28.15; Found: C 37.98, H 3.19, N 28.10. Yield for compound **2**: 29% based on Ni(ClO<sub>4</sub>)<sub>2</sub>·6H<sub>2</sub>O. Anal. Calcd (%) for C<sub>360</sub>H<sub>350</sub>B<sub>24</sub>Fe<sub>24</sub>Ni<sub>18</sub>N<sub>228</sub>O<sub>50</sub>: C 38.17, H 3.11, N 28.20; Found: C 37.84, H 3.23, N 27.90. Yield for compound **3**: 27% based on Mn(ClO<sub>4</sub>)<sub>2</sub>·6H<sub>2</sub>O. Anal. Calcd (%) for C<sub>360</sub>H<sub>353</sub>B<sub>24</sub>Fe<sub>32</sub>Mn<sub>10</sub>N<sub>228</sub>O<sub>52</sub>: C 38.26, H 3.15, N 28.26; Found: C 37.87, H 3.19, N 27.92.

### Structure determination and refinement

The single-crystal XRD data for **1-3** were collected on Bruker D8 Venture CMOS-based diffractometer (Mo-K $\alpha$  radiation,  $\lambda = 0.71073$  Å) using the SMART and SAINT programs. Final unit cell parameters were based on all observed reflections from integration of all frame data. The structures were solved with the ShelXT structure solution program using Intrinsic Phasing and refined with the ShelXL refinement package using Least Squares minimization that implanted in Olex2. For

all compounds, all non-hydrogen atoms were refined anisotropically and the hydrogen atoms of organic ligands were located geometrically and fixed isotropic thermal parameters. Due to the strong disordering of the H<sub>2</sub>O molecular, some hydrogen atoms could not be added. For **3-Mn**, a part of the [Fe<sup>III</sup>(Tp)(CN)<sub>3</sub>]<sup>-</sup> unit decomposed to release Fe<sup>III</sup> ions into the [Fe(NC)<sub>4</sub>(H<sub>2</sub>O)<sub>2</sub>] and [Fe(NC)<sub>4</sub>(L)(H<sub>2</sub>O)] moieties. The exact molecular formula and molecular weight were calculated from the real structure and unmatched with the refinement results.

### **IR Spectra measurements.**

Infrared spectra were measured on KBr pellets samples using a Nicolet iS10 FT-IR spectrometer.

### **XPS Spectra measurements.**

XPS spectra were measured using ESCALAB XI+ from thermo company and simulated in XPSPEAK41.

### **<sup>57</sup>Fe Mössbauer spectra measurement**

Zero-field <sup>57</sup>Fe Mössbauer spectra were recorded on a WSS-10 spectrometer with a proportional counter. The temperature of the sample was controlled by Model 22C digital temperature controller from Janis Research Company. The Doppler velocity of the spectrometer was calibrated with respect to α-Fe.

### **Magnetic Studies**

Magnetic measurements of samples were performed on a Quantum Design PPMS-9. Measurements were performed using finely ground microcrystalline powders restrained by the parafilm with polycarbonate capsules. Data were corrected for the diamagnetic contribution calculated from Pascal constants and background from the parafilm and capsules.

### **References**

S1 R. Lescouëzec, J. Vaissermann, F. Lloret, M. Julve and M. Verdaguer, Ferromagnetic Coupling

between Low- and High-Spin Iron(III) Ions in the Tetranuclear Complex fac-  
{[Fe<sup>III</sup>{HB(pz)<sub>3</sub>}(CN)<sub>2</sub>(μ-CN)]<sub>3</sub>Fe<sup>III</sup>(H<sub>2</sub>O)<sub>3</sub>}·6H<sub>2</sub>O ([HB(pz)<sub>3</sub>]<sup>-</sup> = Hydrotris(1-pyrazolyl)borate),  
*Inorg. Chem.*, 2002, **41**, 5943-5945.

**Table S1.** Crystal Data and Structure Refinements for compounds **1-3** at 150 K.

|                                                                  | <b>1-Fe</b>                                                                                            | <b>2-Ni</b>                                                                                                             | <b>3-Mn</b>                                                                                                             |
|------------------------------------------------------------------|--------------------------------------------------------------------------------------------------------|-------------------------------------------------------------------------------------------------------------------------|-------------------------------------------------------------------------------------------------------------------------|
| CCDC                                                             | 2068740                                                                                                | 2068741                                                                                                                 | 2068760                                                                                                                 |
| Formula                                                          | C <sub>360</sub> H <sub>354</sub> B <sub>24</sub> Fe <sub>42</sub><br>N <sub>228</sub> O <sub>54</sub> | C <sub>360</sub> H <sub>350</sub> B <sub>24</sub> Fe <sub>24</sub><br>Ni <sub>18</sub> N <sub>228</sub> O <sub>50</sub> | C <sub>360</sub> H <sub>353</sub> B <sub>24</sub> Fe <sub>32</sub><br>Mn <sub>10</sub> N <sub>228</sub> O <sub>52</sub> |
| Fw                                                               | 11343.12                                                                                               | 11326.36                                                                                                                | 11301.04                                                                                                                |
| Crystal system                                                   | Cubic                                                                                                  | Cubic                                                                                                                   | Cubic                                                                                                                   |
| Space group                                                      | <i>Pn</i> $\bar{3}$ <i>n</i>                                                                           | <i>Pn</i> $\bar{3}$ <i>n</i>                                                                                            | <i>Pn</i> $\bar{3}$ <i>n</i>                                                                                            |
| <i>a</i> (Å)                                                     | 30.7285(8)                                                                                             | 30.7270(3)                                                                                                              | 30.9319(9)                                                                                                              |
| <i>b</i> (Å)                                                     | 30.7285(8)                                                                                             | 30.7270(3)                                                                                                              | 30.9319(9)                                                                                                              |
| <i>c</i> (Å)                                                     | 30.7285(8)                                                                                             | 30.7270(3)                                                                                                              | 30.9319(9)                                                                                                              |
| $\alpha$ (°)                                                     | 90                                                                                                     | 90                                                                                                                      | 90                                                                                                                      |
| $\beta$ (°)                                                      | 90                                                                                                     | 90                                                                                                                      | 90                                                                                                                      |
| $\gamma$ (°)                                                     | 90                                                                                                     | 90                                                                                                                      | 90                                                                                                                      |
| <i>V</i> (Å <sup>3</sup> )                                       | 29015(2)                                                                                               | 29010.9(8)                                                                                                              | 29595(3)                                                                                                                |
| <i>Z</i>                                                         | 2                                                                                                      | 2                                                                                                                       | 2                                                                                                                       |
| <i>D</i> <sub>calc</sub> (g/cm <sup>3</sup> )                    | 1.292                                                                                                  | 1.291                                                                                                                   | 1.260                                                                                                                   |
| <i>F</i> (000)                                                   | 11400.0                                                                                                | 11408.0                                                                                                                 | 11308.0                                                                                                                 |
| Reflections collected                                            | 89025                                                                                                  | 75511                                                                                                                   | 141076                                                                                                                  |
| Unique reflections ( <i>R</i> <sub>int</sub> )                   | 0.0682                                                                                                 | 0.0856                                                                                                                  | 0.0720                                                                                                                  |
| Goodness-of-fit on <i>F</i> <sup>2</sup>                         | 1.019                                                                                                  | 1.025                                                                                                                   | 1.055                                                                                                                   |
| <i>R</i> <sub>1</sub> [ <i>I</i> > 2σ( <i>I</i> )] <sup>a</sup>  | 0.0622                                                                                                 | 0.0553                                                                                                                  | 0.0569                                                                                                                  |
| <i>wR</i> <sub>2</sub> [ <i>I</i> > 2σ( <i>I</i> )] <sup>b</sup> | 0.1700                                                                                                 | 0.1684                                                                                                                  | 0.1626                                                                                                                  |

$$R_I = \Sigma (|F_0| - |F_C|) / \Sigma |F_0|; wR_2 = [\Sigma w (|F_0| - |F_C|)^2 / \Sigma w F_0^2]^{1/2}.$$

**Table S2.** Selected Bond Lengths (Å) and Bond Angles (°) for compound **1**.

| <b>Compound 1<sup>150K</sup></b>     |            |                                      |            |
|--------------------------------------|------------|--------------------------------------|------------|
| Bond length (Å)                      |            |                                      |            |
| Fe1–O1                               | 2.029(4)   | Fe2–N7 <sup>4</sup>                  | 2.022(3)   |
| Fe1–N8 <sup>1</sup>                  | 2.072(2)   | Fe2–N7 <sup>5</sup>                  | 2.022(3)   |
| Fe1–N8 <sup>2</sup>                  | 2.072(2)   | Fe2–N7                               | 2.022(3)   |
| Fe1–N9                               | 2.044(3)   | Fe3–N2                               | 1.999(2)   |
| Fe1–N9 <sup>3</sup>                  | 2.044(3)   | Fe3–N4                               | 2.000(2)   |
| Fe1–N10                              | 2.197(3)   | Fe3–N6                               | 2.013(3)   |
| Fe2–O2                               | 2.124(9)   | Fe3–C10                              | 1.853(3)   |
| Fe2–O3                               | 2.098(7)   | Fe3–C11                              | 1.886(3)   |
| Fe2–N7                               | 2.022(3)   | Fe3–C12                              | 1.880(3)   |
| Bond angle (°)                       |            |                                      |            |
| O1–Fe1–N8 <sup>1</sup>               | 92.29(7)   | N7–Fe2–O3                            | 88.51(11)  |
| O1–Fe1–N8 <sup>2</sup>               | 92.29(7)   | N7 <sup>4</sup> –Fe2–N7 <sup>1</sup> | 89.961(6)  |
| O1–Fe1–N9 <sup>3</sup>               | 90.31(8)   | N7 <sup>1</sup> –Fe2–N7 <sup>5</sup> | 177.0(2)   |
| O1–Fe1–N9                            | 90.30(8)   | N7 <sup>4</sup> –Fe2–N7 <sup>5</sup> | 89.961(6)  |
| O1–Fe1–N10                           | 180.00(3)  | N7–Fe2–N7 <sup>4</sup>               | 177.0(2)   |
| N8 <sup>1</sup> –Fe1–N8 <sup>2</sup> | 175.43(15) | N7–Fe2–N7 <sup>1</sup>               | 89.960(6)  |
| N8 <sup>2</sup> –Fe1–N10             | 87.71(7)   | N7–Fe2–N7 <sup>5</sup>               | 89.962(6)  |
| N8 <sup>1</sup> –Fe1–N10             | 87.71(7)   | N2–Fe3–N4                            | 87.40(10)  |
| N9–Fe1–N8 <sup>1</sup>               | 89.79(10)  | N2–Fe3–N6                            | 87.67(10)  |
| N9–Fe1–N8 <sup>2</sup>               | 90.18(10)  | N4–Fe3–N6                            | 86.63(10)  |
| N9 <sup>3</sup> –Fe1–N8 <sup>1</sup> | 90.18(10)  | C10–Fe3–N2                           | 93.89(12)  |
| N9 <sup>3</sup> –Fe1–N8 <sup>2</sup> | 89.79(10)  | C10–Fe3–N4                           | 173.88(12) |
| N9 <sup>3</sup> –Fe1–N9              | 179.39(16) | C10–Fe3–N6                           | 87.44(12)  |
| N9 <sup>3</sup> –Fe1–N10             | 89.69(8)   | C10–Fe3–C11                          | 88.53(13)  |
| N9–Fe1–N10                           | 89.70(8)   | C10–Fe3–C12                          | 90.73(13)  |
| O3–Fe2–O2                            | 180.0      | C11–Fe3–N2                           | 89.41(11)  |
| N7 <sup>1</sup> –Fe2–O2              | 91.49(11)  | C11–Fe3–N4                           | 97.47(11)  |
| N7 <sup>4</sup> –Fe2–O2              | 91.49(11)  | C11–Fe3–N6                           | 174.85(12) |
| N7 <sup>5</sup> –Fe2–O2              | 91.49(11)  | C12–Fe3–N2                           | 175.21(11) |
| N7–Fe2–O2                            | 91.49(11)  | C12–Fe3–N4                           | 87.87(11)  |
| N7 <sup>5</sup> –Fe2–O3              | 88.51(11)  | C12–Fe3–N6                           | 91.28(12)  |
| N7 <sup>4</sup> –Fe2–O3              | 88.51(11)  | C12–Fe3–C11                          | 91.97(13)  |
| N7 <sup>1</sup> –Fe2–O3              | 88.51(11)  |                                      |            |

 $^1+X, +Z, 3/2-Y; ^2 1/2-Z, 1/2-X, +Y; ^3 1/2-Y, 1/2-X, 3/2-Z; ^4 +X, 3/2-Y, 3/2-Z; ^5 +X, 3/2-Z, +Y; ^6 1/2-Y, +Z, 1/2-X$

**Table S3.** Selected Bond Lengths (Å) and Bond Angles (°) for compound **2**.

| <b>Compound 2<sup>150K</sup></b>     |            |                                      |            |
|--------------------------------------|------------|--------------------------------------|------------|
| <b>Bond length (Å)</b>               |            |                                      |            |
| Ni1–O1                               | 2.064(9)   | Ni2–N9                               | 2.044(3)   |
| Ni1–O2                               | 2.090(9)   | Ni2–N9 <sup>5</sup>                  | 2.044(3)   |
| Ni1–N7 <sup>1</sup>                  | 2.024(3)   | Ni2–N10                              | 2.200(5)   |
| Ni1–N7 <sup>2</sup>                  | 2.024(3)   | Fe1–N2                               | 2.001(3)   |
| Ni1–N7 <sup>3</sup>                  | 2.024(3)   | Fe1–N4                               | 2.001(3)   |
| Ni1–N7                               | 2.024(3)   | Fe1–N6                               | 2.016(3)   |
| Ni2–O3                               | 2.018(5)   | Fe1–C10                              | 1.852(4)   |
| Ni2–N8 <sup>4</sup>                  | 2.070(3)   | Fe1–C11                              | 1.882(4)   |
| Ni2–N8 <sup>1</sup>                  | 2.070(3)   | Fe1–C12                              | 1.866(4)   |
| <b>Bond angle (°)</b>                |            |                                      |            |
| O1–Ni1–O2                            | 180.0      | N9 <sup>5</sup> –Ni2–N8 <sup>4</sup> | 89.63(12)  |
| N7 <sup>1</sup> –Ni1–O1              | 91.46(13)  | N9 <sup>5</sup> –Ni2–N8 <sup>1</sup> | 90.33(12)  |
| N7 <sup>2</sup> –Ni1–O1              | 91.46(13)  | N9–Ni2–N8 <sup>1</sup>               | 89.62(12)  |
| N7 <sup>3</sup> –Ni1–O1              | 91.46(13)  | N9–Ni2–N8 <sup>4</sup>               | 90.33(12)  |
| N7–Ni1–O1                            | 91.45(13)  | N9 <sup>5</sup> –Ni2–N9              | 179.0(2)   |
| N7 <sup>1</sup> –Ni1–O2              | 88.54(13)  | N9–Ni2–N10                           | 89.48(10)  |
| N7–Ni1–O2                            | 88.55(13)  | N9 <sup>5</sup> –Ni2–N10             | 89.48(10)  |
| N7 <sup>2</sup> –Ni1–O2              | 88.54(13)  | N2–Fe1–N4                            | 87.44(12)  |
| N7 <sup>3</sup> –Ni1–O2              | 88.54(13)  | N2–Fe1–N6                            | 87.47(13)  |
| N7 <sup>1</sup> –Ni1–N7 <sup>2</sup> | 89.963(7)  | N4–Fe1–N6                            | 86.81(13)  |
| N7 <sup>3</sup> –Ni1–N7 <sup>2</sup> | 89.963(7)  | C10–Fe1–N2                           | 94.10(15)  |
| N7 <sup>3</sup> –Ni1–N7              | 89.960(7)  | C10–Fe1–N4                           | 174.07(15) |
| N7 <sup>2</sup> –Ni1–N7              | 177.1(3)   | C10–Fe1–N6                           | 87.54(15)  |
| N7 <sup>1</sup> –Ni1–N7              | 89.966(7)  | C10–Fe1–C11                          | 88.27(16)  |
| N7 <sup>3</sup> –Ni1–N7 <sup>1</sup> | 177.1(3)   | C10–Fe1–C12                          | 90.67(16)  |
| O3–Ni2–N8 <sup>4</sup>               | 92.62(9)   | C11–Fe1–N2                           | 89.58(14)  |
| O3–Ni2–N8 <sup>1</sup>               | 92.62(9)   | C11–Fe1–N4                           | 97.47(14)  |
| O3–Ni2–N9 <sup>5</sup>               | 90.52(10)  | C11–Fe1–N6                           | 174.69(15) |
| O3–Ni2–N9                            | 90.52(10)  | C12–Fe1–N2                           | 175.04(14) |
| O3–Ni2–N10                           | 180.00(18) | C12–Fe1–N4                           | 87.68(14)  |
| N8 <sup>1</sup> –Ni2–N8 <sup>4</sup> | 174.75(19) | C12–Fe1–C6                           | 91.37(15)  |
| N8 <sup>1</sup> –Ni2–N10             | 87.38(9)   | C12–Fe1–C11                          | 91.94(16)  |
| N8 <sup>4</sup> –Ni2–N10             | 87.38(9)   |                                      |            |

<sup>1</sup>+X,<sup>2</sup>+Z,1/2-Y;<sup>3</sup>+X,1/2-Z,+Y;<sup>4</sup>+Y,1/2-Y,1/2-Z;<sup>5</sup>1/2-Z,1/2-X;<sup>6</sup>1/2-Z,1/2-Y,1/2-X



**Table S4.** Selected Bond Lengths (Å) and Bond Angles (°) for compound **3**.

| <b>Compound 3<sup>150K</sup></b>     |            |                                      |            |
|--------------------------------------|------------|--------------------------------------|------------|
| Bond length (Å)                      |            |                                      |            |
| Fe1–N2                               | 1.995(3)   | Mn1–N7                               | 2.118(3)   |
| Fe1–N4                               | 1.991(3)   | Mn1–N7 <sup>3</sup>                  | 2.118(3)   |
| Fe1–N6                               | 2.004(3)   | Mn1–O1                               | 2.118(5)   |
| Fe1–C12                              | 1.867(4)   | Mn2–N9 <sup>4</sup>                  | 2.073(3)   |
| Fe1–C11                              | 1.889(4)   | Mn2–N9 <sup>2</sup>                  | 2.073(3)   |
| Fe1–C10                              | 1.882(4)   | Mn2–N9 <sup>5</sup>                  | 2.073(3)   |
| Mn1–N10                              | 2.261(4)   | Mn2–N9                               | 2.073(3)   |
| Mn1–N8 <sup>1</sup>                  | 2.157(3)   | Mn2–O2                               | 2.200(10)  |
| Mn1–N8 <sup>2</sup>                  | 2.157(3)   | Mn2–O3                               | 2.131(11)  |
| Bond angle (°)                       |            |                                      |            |
| N2–Fe1–N6                            | 86.74(11)  | N7 <sup>3</sup> –Mn1–N8 <sup>2</sup> | 89.57(11)  |
| N4–Fe1–N2                            | 87.70(11)  | N7 <sup>3</sup> –Mn1–N7              | 179.8(2)   |
| N4–Fe1–N6                            | 88.12(12)  | N7–Mn1–O1                            | 89.88(9)   |
| C12–Fe1–N2                           | 174.52(14) | N7 <sup>3</sup> –Mn1–O1              | 89.88(9)   |
| C12–Fe1–N4                           | 93.83(14)  | O1–Mn1–N10                           | 180.0(3)   |
| C12–Fe1–N6                           | 88.05(14)  | O1–Mn1–N8 <sup>1</sup>               | 92.25(9)   |
| C12–Fe1–C11                          | 88.49(15)  | O1–Mn1–N8 <sup>2</sup>               | 92.25(9)   |
| C12–Fe1–C10                          | 89.75(15)  | N9 <sup>1</sup> –Mn2–N9 <sup>4</sup> | 174.8(3)   |
| C11–Fe1–N2                           | 96.78(13)  | N9 <sup>5</sup> –Mn2–N9              | 174.8(3)   |
| C11–Fe1–N4                           | 90.11(13)  | N9 <sup>1</sup> –Mn2–N9 <sup>5</sup> | 89.883(12) |
| C11–Fe1–N6                           | 175.99(13) | N9 <sup>4</sup> –Mn2–N9              | 89.884(12) |
| C10–Fe1–N2                           | 88.71(13)  | N9 <sup>1</sup> –Mn2–N9              | 89.881(12) |
| C10–Fe1–N4                           | 176.41(13) | N9 <sup>4</sup> –Mn2–N9 <sup>5</sup> | 89.883(12) |
| C10–Fe1–N6                           | 91.73(14)  | N9–Mn2–O2                            | 87.41(13)  |
| C10–Fe1–C11                          | 90.26(15)  | N9 <sup>4</sup> –Mn2–O2              | 87.41(13)  |
| N8 <sup>1</sup> –Mn1–N10             | 87.75(9)   | N9 <sup>1</sup> –Mn2–O2              | 87.41(13)  |
| N8 <sup>2</sup> –Mn1–N10             | 87.75(9)   | N9 <sup>5</sup> –Mn2–O2              | 87.41(13)  |
| N8 <sup>1</sup> –Mn1–N8 <sup>2</sup> | 175.50(17) | N9–Mn2–O3                            | 92.59(13)  |
| N7 <sup>3</sup> –Mn1–N10             | 90.12(9)   | N9 <sup>5</sup> –Mn2–O3              | 92.59(13)  |
| N7–Mn1–N10                           | 90.12(9)   | N9 <sup>1</sup> –Mn2–O3              | 92.59(13)  |
| N7–Mn1–N8 <sup>2</sup>               | 90.44(11)  | N9 <sup>4</sup> –Mn2–O3              | 92.59(13)  |
| N7 <sup>3</sup> –Mn1–N8 <sup>1</sup> | 90.44(11)  | O3–Mn2–O2                            | 180.0      |
| N7–Mn1–N8 <sup>1</sup>               | 89.57(11)  |                                      |            |

<sup>1</sup>+Z,+Y,1/2-X;<sup>2</sup>1/2-Z,+X,1/2-Y;<sup>3</sup>1/2-X,1/2-Z,1/2-Y;<sup>4</sup>1/2-Z,+Y,+X;<sup>5</sup>1/2-X,+Y,1/2-Z;<sup>6</sup>+Y,  
1/2-Z,1/2-X

**Table S5.** The Fe···Fe edge lengths for the squares, rectangles, and regular triangles for **1-3**.

|             | Squares (Å) | Rectangles (Å) | Regular triangles (Å) |
|-------------|-------------|----------------|-----------------------|
| <b>1-Fe</b> | 6.775       | 6.775*7.306    | 7.306                 |
| <b>2-Ni</b> | 6.778       | 6.778*7.304    | 7.304                 |
| <b>3-Mn</b> | 6.847       | 6.847*7.392    | 7.392                 |

**Table S6.** Mössbauer parameters for compounds **1-3** at 80 K.

|                                                                                                                                                                                                                                | $\delta$<br>mm s <sup>-1</sup> | $\Delta E_Q$<br>mm s <sup>-1</sup> | Content<br>% | Calcd.<br>% | Assignments                                   |
|--------------------------------------------------------------------------------------------------------------------------------------------------------------------------------------------------------------------------------|--------------------------------|------------------------------------|--------------|-------------|-----------------------------------------------|
| <b>1-Fe</b><br>[ <sup>Tp</sup> Fe <sup>II</sup> <sub>LS</sub> ] <sub>24</sub> [Fe <sup>III</sup> <sub>HS</sub> ] <sub>18</sub>                                                                                                 | 0.05                           | 0.49                               | 56.07        | 57.14       | <sup>Tp</sup> Fe <sup>II</sup> <sub>LS</sub>  |
|                                                                                                                                                                                                                                | 0.45                           | 0.87                               | 43.93        | 42.86       | Fe <sup>III</sup> <sub>HS</sub>               |
| <b>2-Ni</b><br>[ <sup>Tp</sup> Fe <sup>II</sup> <sub>LS</sub> ] <sub>14</sub> [ <sup>Tp</sup> Fe <sup>II</sup> <sub>LS</sub> ] <sub>10</sub> [Ni <sup>II</sup> ] <sub>18</sub>                                                 | 0.17                           | 0.47                               | 40.26        | 41.67       | <sup>Tp</sup> Fe <sup>II</sup> <sub>LS</sub>  |
|                                                                                                                                                                                                                                | 0.03                           | 1.05                               | 59.74        | 58.33       | <sup>Tp</sup> Fe <sup>III</sup> <sub>LS</sub> |
| <b>3-Mn</b><br>[ <sup>Tp</sup> Fe <sup>III</sup> <sub>LS</sub> ] <sub>7</sub> [ <sup>Tp</sup> Fe <sup>II</sup> <sub>LS</sub> ] <sub>17</sub> [Fe <sup>III</sup> <sub>HS</sub> ] <sub>8</sub> [Mn <sup>II</sup> ] <sub>10</sub> | 0.04                           | 0.49                               | 52.59        | 53.13       | <sup>Tp</sup> Fe <sup>II</sup> <sub>LS</sub>  |
|                                                                                                                                                                                                                                | -0.06                          | 1.07                               | 22.58        | 21.88       | <sup>Tp</sup> Fe <sup>III</sup> <sub>LS</sub> |
|                                                                                                                                                                                                                                | 0.43                           | 0.90                               | 24.83        | 25.00       | Fe <sup>III</sup> <sub>HS</sub>               |

**Table S7.** ICP-AES experiments results for compounds **1-3**.

|             | Element | Concentration (mg/L) | Concentration (mmol/L) | Elemental ratio |
|-------------|---------|----------------------|------------------------|-----------------|
| <b>1-Fe</b> | Fe      | 35.02                | 0.63                   | 1.00            |
| <b>2-Ni</b> | Fe      | 29.84                | 0.53                   | 0.57            |
|             | Ni      | 23.34                | 0.40                   | 0.43            |
| <b>3-Mn</b> | Fe      | 34.20                | 0.61                   | 0.75            |
|             | Mn      | 11.30                | 0.20                   | 0.25            |

**Table S8.** The  $\chi_m T$  value at 300 K and Curie-Weiss fitting value of **1-3**.

|                                                                   | <b>1-Fe</b> | <b>2-Ni</b> | <b>3-Mn</b> |
|-------------------------------------------------------------------|-------------|-------------|-------------|
| $\chi_m T$ -experimental<br>(cm <sup>3</sup> mol <sup>-1</sup> K) | 75.82       | 31.84       | 80.40       |
| $\chi_m T$ -calculated<br>(cm <sup>3</sup> mol <sup>-1</sup> K)   | 78.75       | 32.68       | 83.19       |
| Curie constant<br>(cm <sup>3</sup> mol <sup>-1</sup> K)           | 74.76       | 30.84       | 79.30       |
| Weiss temperature<br>(K)                                          | 3.24        | 4.22        | 3.28        |

**Table S9.** The ground spin state,  $\Delta S_{\max}$ -experimental and  $\Delta S_{\max}$ -calculated for **1-3**.

|                                                                          | <b>1-Fe</b> | <b>2-Ni</b> | <b>3-Mn</b> |
|--------------------------------------------------------------------------|-------------|-------------|-------------|
| $S$ (ground spin state)                                                  | 90/2        | 50/2        | 97/2        |
| $\Delta S_{\max}$ -experimental<br>(J kg <sup>-1</sup> K <sup>-1</sup> ) | 17.48       | 9.46        | 19.84       |
| $\Delta S_{\max}$ -calculated<br>(J kg <sup>-1</sup> K <sup>-1</sup> )   | 23.64       | 14.51       | 27.30       |

$$\Delta S_{\max}\text{-calculated} = \Sigma R \ln(2s+1); R = 8.314 \cdot 10^3 / M \text{ J kg}^{-1} \text{ K}^{-1} \text{ (M represents formula weight)}$$

**Table S10.** Summary of  $\Delta S_{\max}$  data based on  $\Delta H$  at given temperature for discrete 3d-metal clusters.

| Compounds                                                                                                                                                                                                                                                                                                                           | $\Delta S_{\max}$<br>(J kg <sup>-1</sup> K <sup>-1</sup> ) | $\Delta H$<br>(T) | $T_{\max}$<br>(K) |
|-------------------------------------------------------------------------------------------------------------------------------------------------------------------------------------------------------------------------------------------------------------------------------------------------------------------------------------|------------------------------------------------------------|-------------------|-------------------|
| [Mn <sup>III</sup> <sub>8</sub> Mn <sup>IV</sup> <sub>4</sub> O <sub>12</sub> (OAc) <sub>16</sub> (H <sub>2</sub> O) <sub>4</sub> ]·2HOAc·4H <sub>2</sub> O <sup>[49]</sup>                                                                                                                                                         | frequency-dependent MCE                                    | 3                 | 1.8               |
| [Mn <sup>III</sup> <sub>8</sub> Mn <sup>IV</sup> <sub>4</sub> O <sub>12</sub> (2-CIPhCO <sub>2</sub> ) <sub>16</sub> (H <sub>2</sub> O) <sub>4</sub> ]<br>CH <sub>2</sub> Cl <sub>2</sub> ·5H <sub>2</sub> O <sup>[50]</sup>                                                                                                        | 4.3                                                        | 3                 | 2.5               |
| [Fe <sup>III</sup> <sub>8</sub> (μ <sub>3</sub> -O) <sub>2</sub> (μ <sub>2</sub> -OH) <sub>12</sub> (tacn) <sub>6</sub> ]Br <sub>8</sub> ·9H <sub>2</sub> O <sup>[51]</sup>                                                                                                                                                         | frequency-dependent and anisotropic MCE                    | 3                 | 1.7               |
| [Fe <sup>III</sup> <sub>14</sub> O <sub>6</sub> (bta) <sub>6</sub> (OMe) <sub>18</sub> Cl <sub>6</sub> ] <sup>[52]</sup>                                                                                                                                                                                                            | 17.6                                                       | 7                 | 6.0               |
| [Fe <sup>III</sup> <sub>14</sub> O <sub>6</sub> (ta) <sub>6</sub> (OMe) <sub>18</sub> Cl <sub>6</sub> ] <sup>[53]</sup>                                                                                                                                                                                                             | 20.3                                                       | 7                 | 6.0               |
| [Mn <sup>III</sup> <sub>6</sub> Mn <sup>II</sup> <sub>4</sub> O <sub>4</sub> Br <sub>4</sub> (amp) <sub>6</sub> (H <sub>2</sub> amp) <sub>3</sub> (H <sub>3</sub> amp)]<br>Br <sub>38</sub> (C <sub>6</sub> H <sub>14</sub> ) <sup>[54]</sup>                                                                                       | 13.0                                                       | 7                 | 2.2               |
| [Mn <sup>III</sup> <sub>6</sub> Mn <sup>II</sup> <sub>4</sub> (OH) <sub>6</sub> I <sub>4</sub> (amp) <sub>4</sub> (Hamp) <sub>4</sub> (EtOH) <sub>4</sub> ]<br>I <sub>4</sub> ·12(EtOH) <sup>[55]</sup>                                                                                                                             | 17.0                                                       | 7                 | 5.2               |
| [Mn <sup>III</sup> <sub>6</sub> Mn <sup>II</sup> <sub>8</sub> (OH) <sub>2</sub> I <sub>4</sub> (Hpeol) <sub>4</sub> (H <sub>2</sub> peol) <sub>6</sub> (EtOH) <sub>6</sub> ]I <sub>4</sub> <sup>[56]</sup>                                                                                                                          | 25.0                                                       | 7                 | 3.8               |
| [Mn <sup>II</sup> (bpy) <sub>3</sub> ] <sub>1.5</sub> [Mn <sup>IV</sup> <sub>8</sub> Mn <sup>II</sup> <sub>24</sub> (thme) <sub>16</sub> (bpy) <sub>24</sub><br>(N <sub>3</sub> ) <sub>12</sub> (OAc) <sub>12</sub> ](ClO <sub>4</sub> ) <sub>11</sub> <sup>[56]</sup>                                                              | 18.2                                                       | 7                 | 1.6               |
| [Mn <sup>III</sup> <sub>6</sub> Mn <sup>II</sup> <sub>4</sub> (μ <sub>3</sub> -O) <sub>4</sub> (Hmpt) <sub>6</sub> (μ <sub>3</sub> -N <sub>3</sub> ) <sub>3</sub> (μ <sub>3</sub> -Br)(Br)]<br>(N <sub>3</sub> ) <sub>0.7</sub> (Br) <sub>0.33</sub> MeCN·2MeOH <sup>[57]</sup>                                                     | 10.3                                                       | 9                 | 2.6               |
| [Mn <sup>III</sup> <sub>11</sub> Mn <sup>II</sup> <sub>6</sub> (μ <sub>4</sub> -O) <sub>8</sub> (μ <sub>3</sub> -Cl) <sub>4</sub> (μ <sub>3</sub> -OAc) <sub>2</sub> (μ <sub>3</sub> -<br>dmp) <sub>10</sub> Cl <sub>2.34</sub> (OAc) <sub>0.66</sub> (py) <sub>3</sub> (MeCN) <sub>2</sub> ]·7MeCN <sup>[58]</sup>                 | 13.3                                                       | 9                 | 5.2               |
| [Mn <sup>III</sup> <sub>12</sub> Mn <sup>II</sup> <sub>7</sub> (μ <sub>4</sub> -O) <sub>8</sub> (Hhmmp) <sub>12</sub> (μ <sub>3</sub> -η <sup>1</sup> N <sub>3</sub> ) <sub>8</sub><br>(MeCN) <sub>6</sub> ]Cl <sub>2</sub> ·MeCN·10MeOH <sup>[58]</sup>                                                                            | 8.9                                                        | 7                 | 4.2               |
| [Mn <sup>III</sup> <sub>12</sub> Mn <sup>II</sup> <sub>7</sub> O <sub>8</sub> (Hhmph) <sub>12</sub> (N <sub>3</sub> ) <sub>3</sub> (MeO) <sub>5.5</sub><br>(MeOH) <sub>3.5</sub> (H <sub>2</sub> O) <sub>1.5</sub> (OH) <sub>0.5</sub> ](OAc)·10H <sub>2</sub> O <sup>[58]</sup>                                                    | 9.0                                                        | 7                 | 7.0               |
| [Na <sub>2</sub> Mn <sup>III</sup> <sub>11</sub> Mn <sup>II</sup> <sub>4</sub> O <sub>8</sub> (Hhmph) <sub>10</sub> (OAc) <sub>2</sub> (H <sub>2</sub> O) <sub>2</sub><br>(MeO) <sub>1.5</sub> (N <sub>3</sub> ) <sub>2.5</sub> ](OAc)·10H <sub>2</sub> O·2MeOH <sup>[59]</sup>                                                     | 9.5                                                        | 7                 | 6.0               |
| Mn <sup>II</sup> <sub>4</sub> (N <sub>3</sub> ) <sub>7.3</sub> Cl <sub>0.7</sub> (dafo) <sub>4</sub> <sup>[59]</sup>                                                                                                                                                                                                                | 19.34                                                      | 5                 | 4.0               |
| [Fe <sup>III</sup> <sub>17</sub> O <sub>16</sub> (OH) <sub>12</sub> (py) <sub>12</sub> Br <sub>4</sub> ]Br <sub>3</sub> <sup>[60]</sup>                                                                                                                                                                                             | 8.9                                                        | 7                 | 2.7               |
| [Mn <sup>III</sup> <sub>36</sub> Mn <sup>II</sup> <sub>13</sub> (μ <sub>4</sub> -O) <sub>32</sub> (μ <sub>3</sub> -OCH <sub>3</sub> ) <sub>8</sub> (μ <sub>3</sub> -hp) <sub>24</sub> (O <sub>2</sub> CH) <sub>6</sub><br>(DMF) <sub>12</sub> ](OH) <sub>8</sub> <sup>[61]</sup>                                                    | 6.4                                                        | 7                 | 10                |
| [Mn <sup>III</sup> <sub>20</sub> Mn <sup>II</sup> <sub>5</sub> Na <sub>4</sub> (μ <sub>4</sub> -O) <sub>16</sub> (μ <sub>3</sub> -OCH <sub>3</sub> ) <sub>4</sub> (μ <sub>3</sub> -hp) <sub>16</sub><br>(O <sub>2</sub> CCH <sub>3</sub> ) <sub>4</sub> (O <sub>2</sub> CH)(DMF) <sub>8</sub> ]·(O <sub>2</sub> CH) <sup>[61]</sup> | 7.7                                                        | 7                 | 8                 |

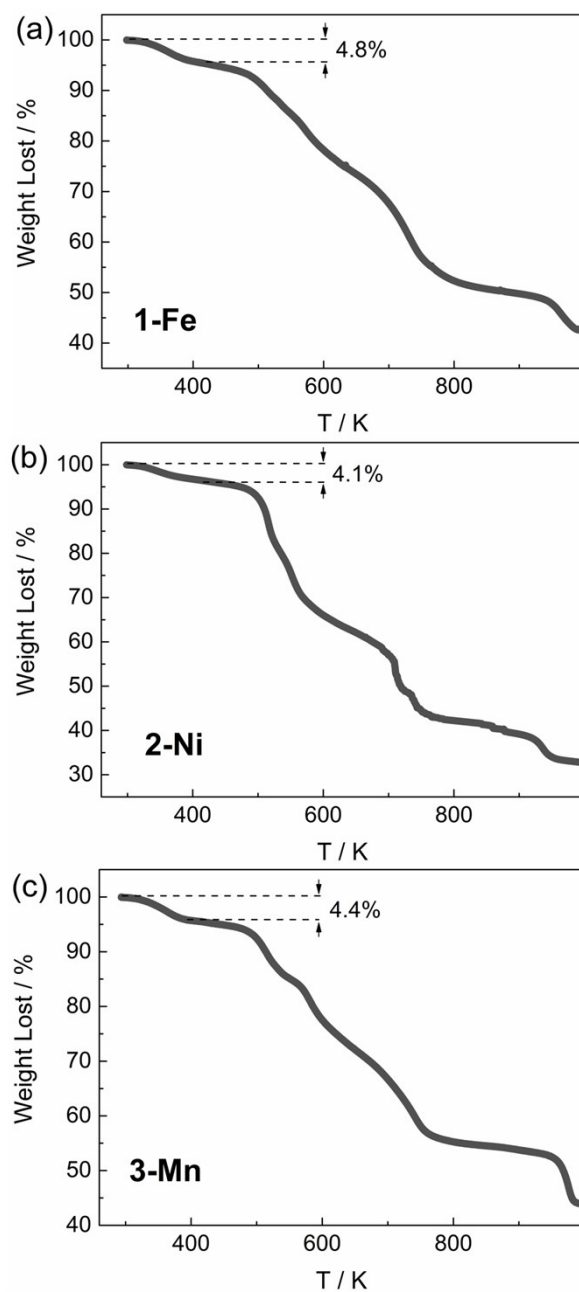

**Fig. S1.** Thermo-gravimetric analysis curve for compounds **1-3** in the Nitrogen atmosphere with the sweeping rate of 10 K min<sup>-1</sup>. The weight lost were all attribute to H<sub>2</sub>O molecules that better accord with the molecular formula of each compounds.



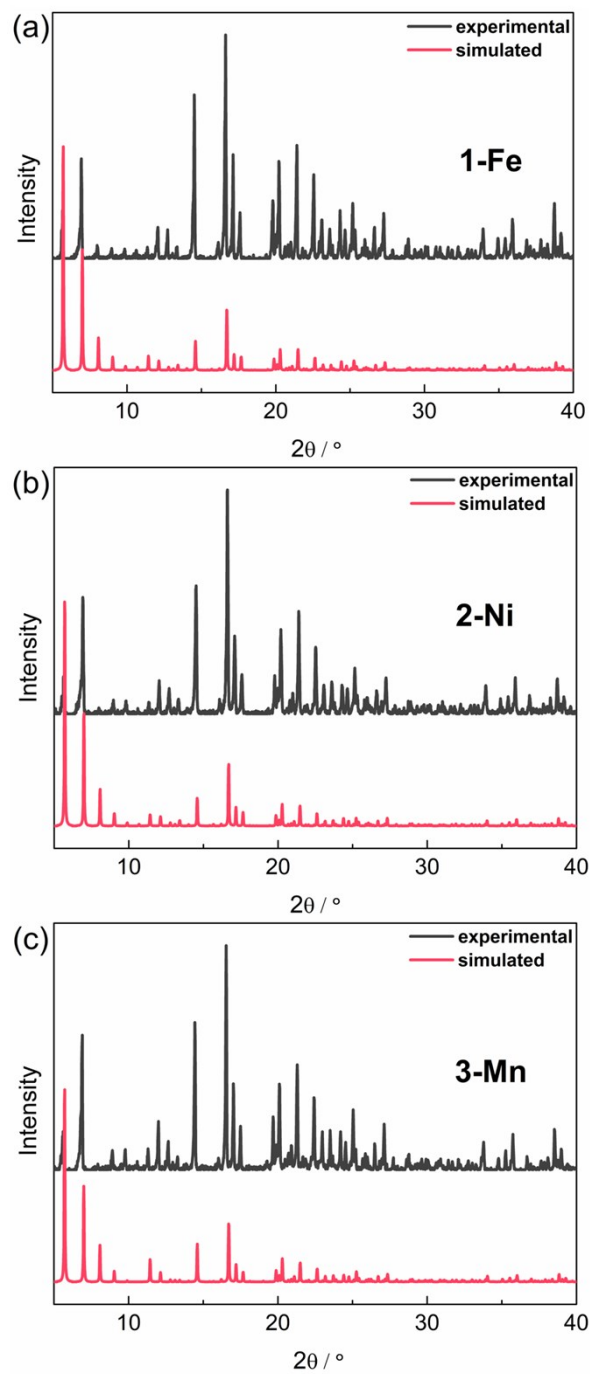

**Fig. S2.** X-ray powder diffraction data for compounds **1-3** at room temperature.

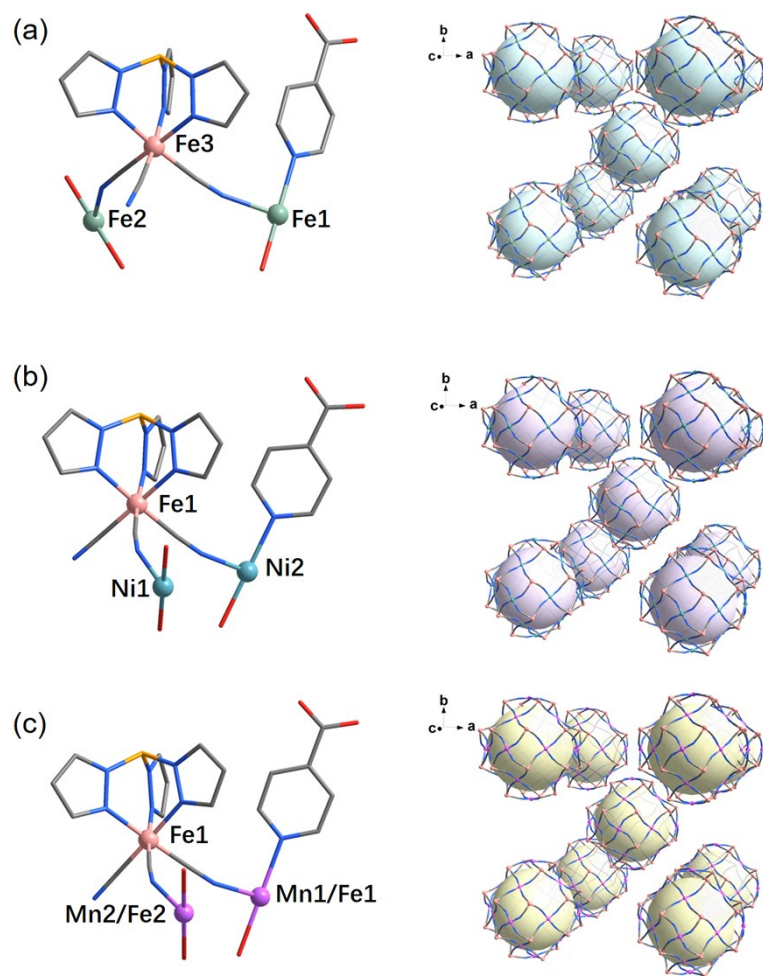

**Fig. S3.** (a) The asymmetric unit and crystal packing for cyanide-bridged framework of **1-Fe**. (b) The asymmetric unit and crystal packing for cyanide-bridged framework of **2-Ni**. (c) The asymmetric unit and crystal packing for cyanide-bridged framework of **3-Mn**. Color code: Fe from  $[\text{Fe}(\text{NC})_4(\text{H}_2\text{O})_2]$  and  $[\text{Fe}(\text{NC})_4(\text{L})(\text{H}_2\text{O})]$ , green; Ni from  $[\text{Ni}(\text{NC})_4(\text{H}_2\text{O})_2]$  and  $[\text{Ni}(\text{NC})_4(\text{L})(\text{H}_2\text{O})]$ , cyan; Mn from  $[\text{Mn}(\text{NC})_4(\text{H}_2\text{O})_2]$  and  $[\text{Mn}(\text{NC})_4(\text{L})(\text{H}_2\text{O})]$ , purple; Fe from  $[\text{Fe}(\text{Tp})(\text{CN})_3]$ , pink; N, blue; C, gray; B, yellow; O, red. Hydrogen atoms and solvents are omitted for clarity.

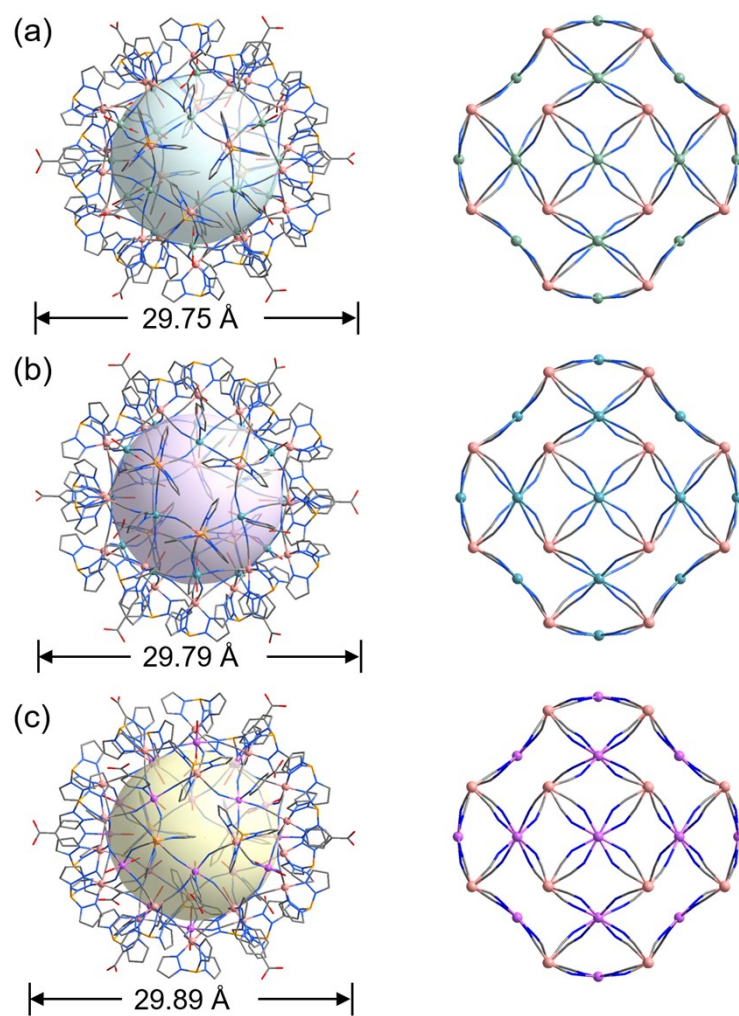

**Fig. S4.** A frame structure of a single  $\{\text{Fe}_{24}\text{M}_{18}\}$  nanocage and the skeleton structure with metal ions bridged by cyanide groups for **1-Fe** (a), **2-Ni** (b) and **3-Mn** (c).

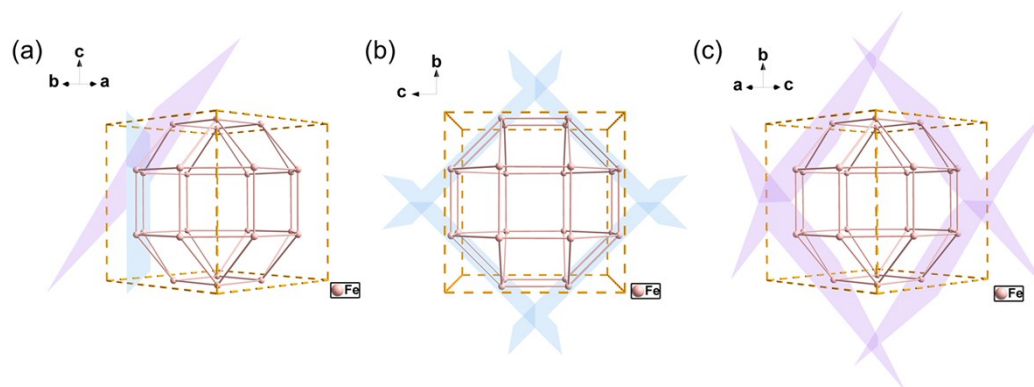

**Fig. S5.** Construction of the pseudo-rhombicuboctahedron through cut of the cubic (a), first cut all the edges of cubic (b) and then cut all angles of cubic (c).

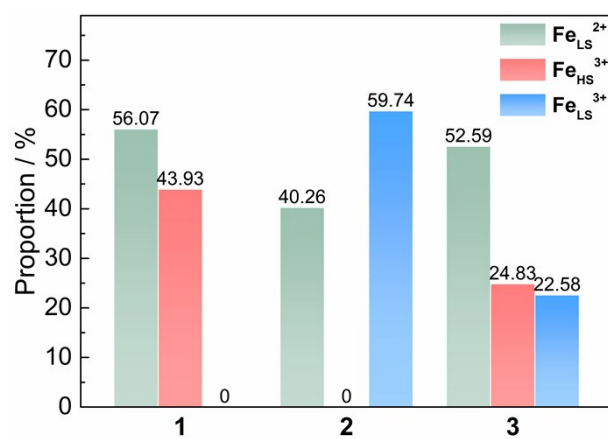

**Fig. S6.** Peak area ratio of different type of Fe species obtained from Mössbauer spectra.

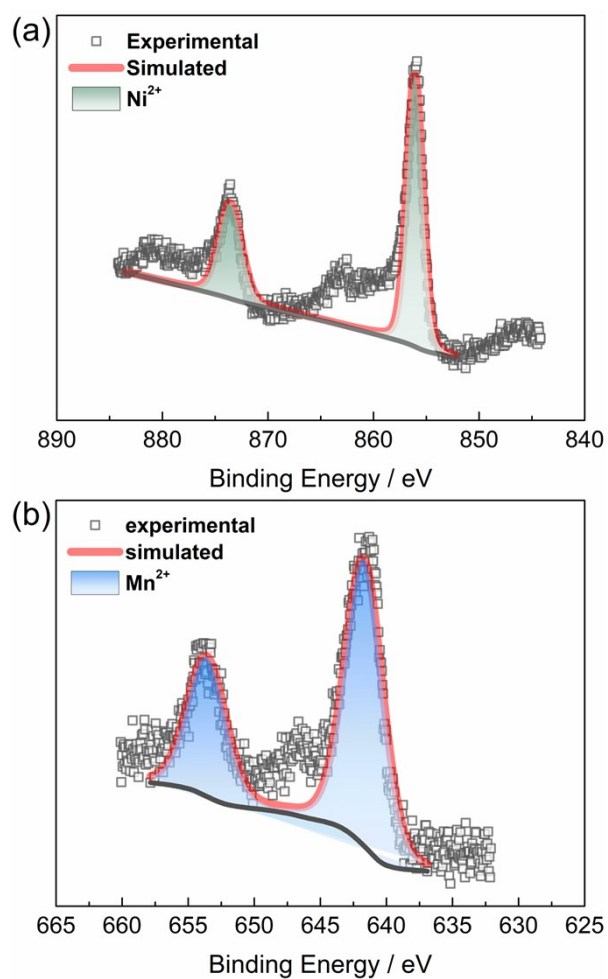

**Fig. S7.** (a) XPS spectra of Ni 2p for compound **2**, the binding energy around 856.1 eV and 873.6 eV can be attributed to Ni<sup>II</sup>. (b) XPS spectra of Mn 2p for compound **3**, the binding energy around 641.8 eV and 653.5 eV can be attributed to Mn<sup>II</sup>.

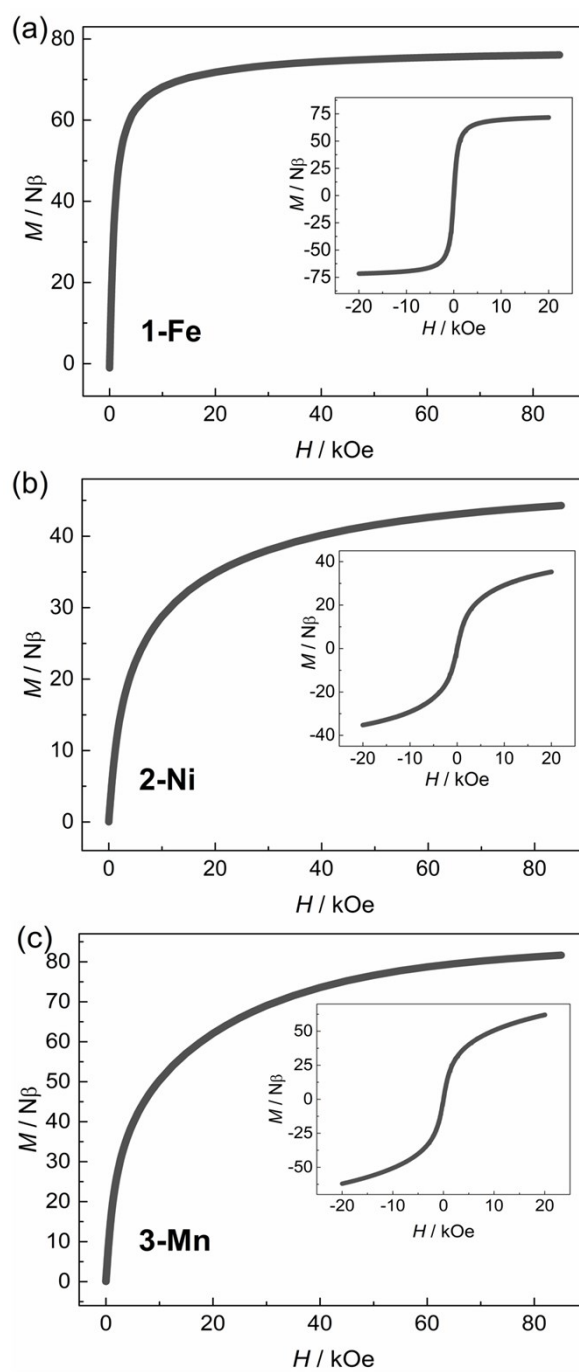

**Fig. S8.** Field-dependent of magnetic susceptibility for compounds **1-3** at 1.8 K. Inset: Field-dependent of magnetic susceptibility loop for compounds **1-3** at 1.8 K.

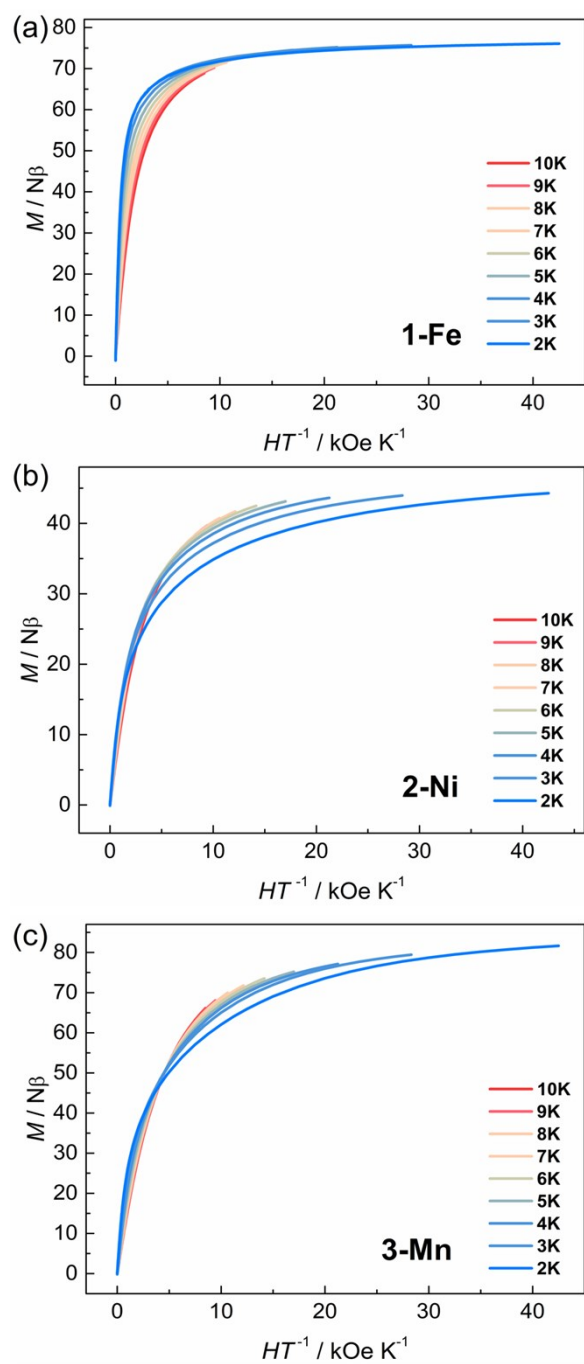

**Fig. S9.** Plot of magnetization ( $M/N\beta$ ) vs  $HT^{-1}$  in the range of 2-10 K for compounds **1-3**.
